# Supplementary material
Source: PubMed Central journal article supplement (PMC4841085)
Supplement: Supp_Figure2.pdf [file Supp_Figure2.pdf]

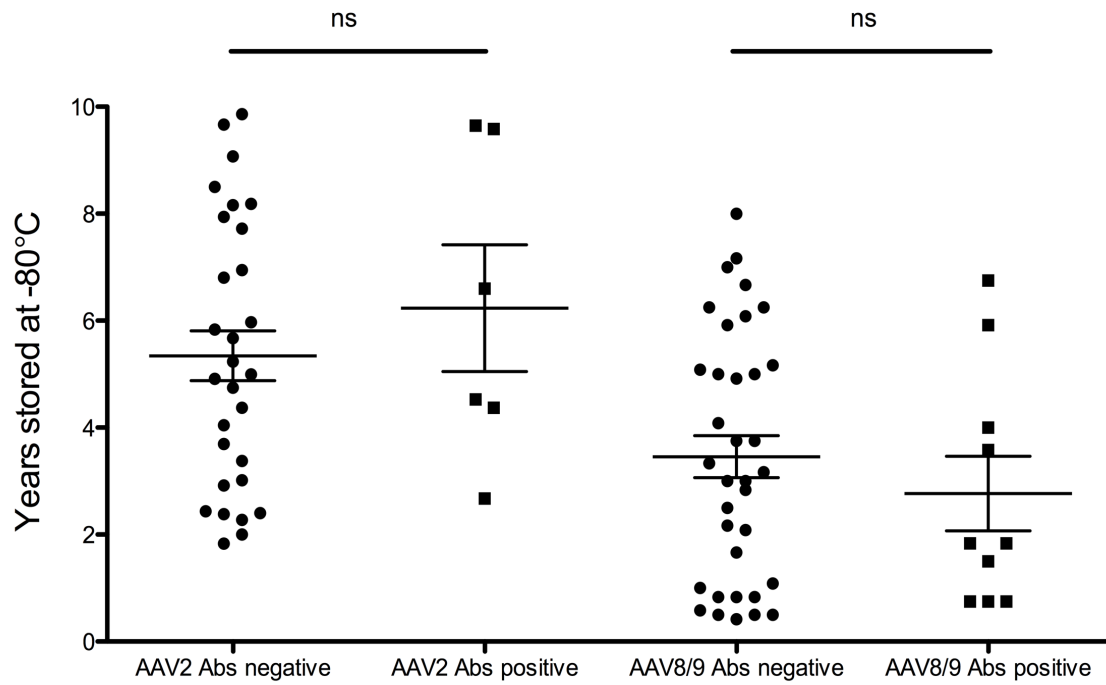

Supplementary Figure S2. To examine the effect of length of storage in our sample set, we analyzed the age of each sample in the seropositive vs seronegative groups. There was no statistically significant difference in the sample age in the AAV Abs positive vs negative groups for any serotype (unpaired t-test  $p=0.77$  AAV2 Abs and  $p=0.83$  AAV8/9 Abs). ns=not significant
