# Supplementary material
Source: PubMed Central journal article supplement (PMC4841085)
Supplement: Supp_Figure3.pdf [file Supp_Figure3.pdf]

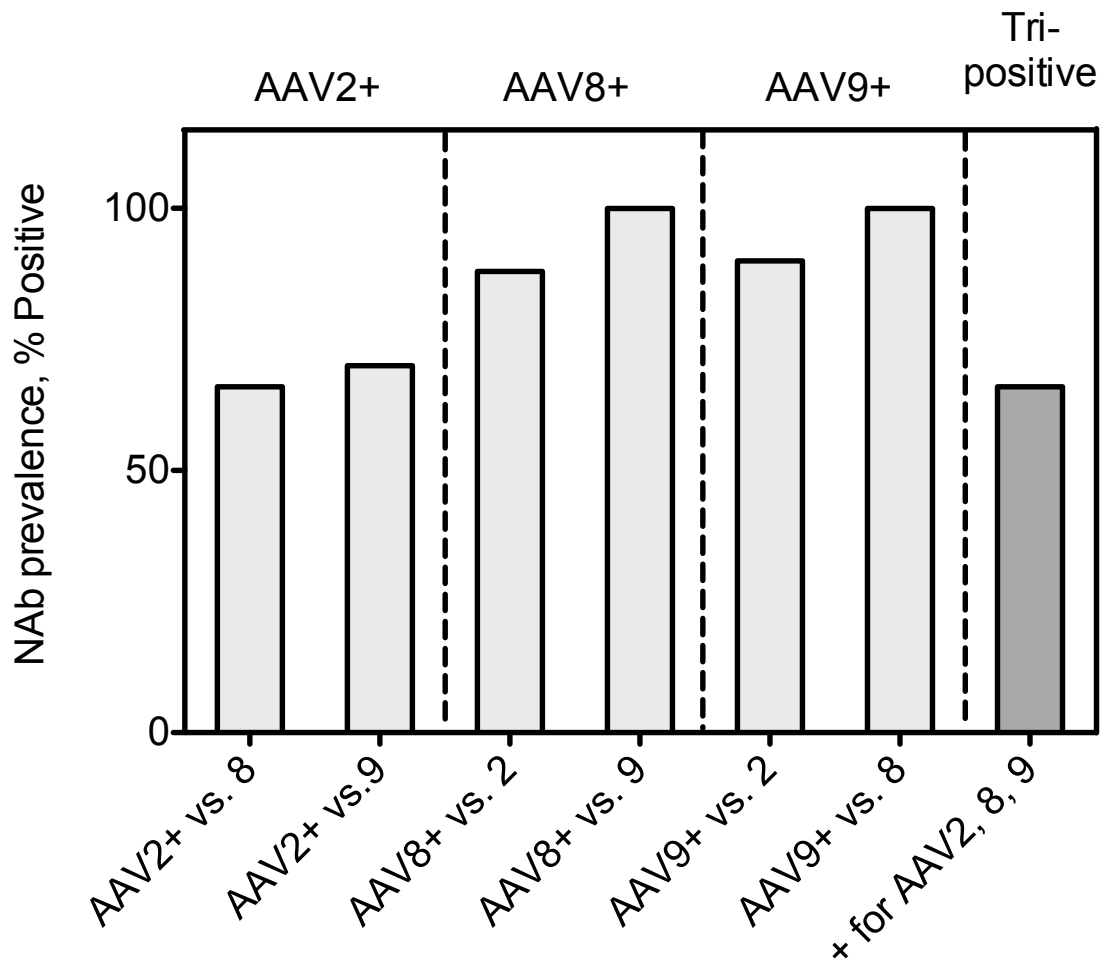

Supplementary Figure S3. Representation of co-seropositivity between AAV serotypes. See Table 2 for details.
