# Supplementary material
Source: PubMed Central journal article supplement (PMC4841085)
Supplement: Supp_Table1.pdf [file Supp_Table1.pdf]

## Supplementary Data

**Supplementary Table S1. Patient cohort, molecular genetics, and propionate incorporation**

| Patient | Age (years)    | Sex | Subtype                | Allele 1                    | Allele 2                         | Patient <sup>14</sup> C-propionate incorporation (nmol/mg protein/18 hr) |        | Control <sup>14</sup> C-propionate incorporation (nmol/mg protein/18 hr) |        |
|---------|----------------|-----|------------------------|-----------------------------|----------------------------------|--------------------------------------------------------------------------|--------|--------------------------------------------------------------------------|--------|
|         |                |     |                        |                             |                                  | -OHcbl                                                                   | +OHcbl | -OHcbl                                                                   | +OHcbl |
| 1       | 2.3            | M   | <i>mut<sup>r</sup></i> | c.1846C>T p.R616C           | c.1846C>T p.R616C                |                                                                          |        |                                                                          |        |
| 2       | 2.4            | F   | <i>mut<sup>r</sup></i> | c.91C>T p.R31X              | c.323G>A p.R108H                 | 2.10                                                                     | 3.10   | 15.50                                                                    | 20.00  |
| 3       | 2.5            | M   | <i>mut<sup>r</sup></i> | c.277C>T p.R93C             | c.1106G>A p.R369H                |                                                                          |        |                                                                          |        |
| 4       | 3.2            | M   | <i>mut<sup>r</sup></i> | c.1207C>T p.R403X           | c.2150G>T p.G717V                |                                                                          |        |                                                                          |        |
| 5       | 3.3            | M   | <i>mut<sup>p</sup></i> | c.1399C>T p.R467X           | c.693C>G p.Y231X                 |                                                                          |        |                                                                          |        |
| 6       | 3.5            | F   | <i>mut<sup>r</sup></i> | c.281G>T p.G94V             | c.2150G>T p.G717V                |                                                                          |        |                                                                          |        |
| 7       | 4.2            | F   | <i>mut<sup>p</sup></i> | c.682C>T p.R228X            | c.1106G>A p.R369H                | 0.40                                                                     | 0.40   | 19.40                                                                    | 24.00  |
| 8       | 4.4            | M   | <i>mut<sup>p</sup></i> | c.91C>T p.R31x              | c.1181dupT p.L394FfsX30          |                                                                          |        |                                                                          |        |
| 9       | 4.4, 2.3       | F   | <i>mut<sup>p</sup></i> | c.607G>A p.G203R            | c.682C>T p.R228X                 | 0.33                                                                     | 0.46   | 10.00                                                                    | 11.00  |
| 10      | 4.5            | F   | <i>mut<sup>p</sup></i> | c.1207C>T p.R403X           | c.2008G>C p.G670R                | 1.10                                                                     | 1.30   | 12.50                                                                    | 13.50  |
| 11      | 4.6            | F   | <i>mut<sup>p</sup></i> | c.2080C>T p.R694V           | c.643G>T p.G215C                 |                                                                          |        |                                                                          |        |
| 12      | 5.6            | M   | <i>mut<sup>p</sup></i> | c.322C>T p.R108C            | c.682C>T p.R228X                 | 1.40                                                                     | 1.50   | 15.80                                                                    | 20.10  |
| 13      | 6.0            | F   | <i>mut<sup>p</sup></i> | c.323G>A p.R108H            | c.1867G>C p.G623R                | 0.28                                                                     | 0.28   | 3.10                                                                     | 7.30   |
| 14      | 6.1            | M   | <i>mut<sup>p</sup></i> | c.1741C>T p.R581x           | c.753 + 2T>A p.?                 | 0.26                                                                     | 0.33   | 11.40                                                                    | 12.60  |
| 15      | 6.5            | F   | <i>mut<sup>p</sup></i> | c.878A>C p.Q293P            | c.878A>C p.Q293P                 |                                                                          |        |                                                                          |        |
| 16      | 6.6            | M   | <i>mut<sup>p</sup></i> | c.2179C>T p.R727X           | c.2179C>T p.R727X                |                                                                          |        |                                                                          |        |
| 17      | 7.2            | M   | <i>mut<sup>p</sup></i> | c.281G>T p.G94V             | c.1867G>C p.G623R                | 1.30                                                                     | 1.50   |                                                                          |        |
| 18      | 7.8            | M   | <i>mut<sup>p</sup></i> | c.1106G>A p.R369H           | c.1778_1782delAAAGT p.S594RfsX11 | 1.85                                                                     | 2.52   | 24.40                                                                    | 26.00  |
| 19      | 8.6            | M   | <i>mut<sup>p</sup></i> | c.1022dupA p.N341KfsX17     | c.671_678dup p.V227NfsX16        | 0.56                                                                     | 0.61   |                                                                          |        |
| 20      | 9.4            | M   | <i>mut<sup>p</sup></i> | c.1105C>T p.R369C           | c.1207C>T p.R403X                | 0.58                                                                     | 0.58   |                                                                          |        |
| 21      | 9.7, 8.2       | M   | <i>mut<sup>p</sup></i> | c.1038_1040delTCT p.347delL | c.349G>T p.E117X                 |                                                                          |        |                                                                          |        |
| 22      | 10.4           | F   | <i>mut<sup>p</sup></i> | c.2179C>T p.R727X           | c.2179C>T p.R727X                | 0.79                                                                     | 0.78   | 14.00                                                                    | 14.00  |
| 23      | 10.6           | M   | <i>mut<sup>p</sup></i> | c.670G>T p.E224X            | c.682C>T p.R228X                 | 0.80                                                                     | 0.80   | 10.30                                                                    | 12.50  |
| 24      | 10.9           | M   | <i>mut<sup>p</sup></i> | c.322C>T p.R108C            | c.322C>T p.R108C                 | 0.31                                                                     | 0.34   | 7.30                                                                     | 7.70   |
| 25      | 11.3           | M   | <i>mut<sup>p</sup></i> | c.682C>T p.R228X            | c.682C>T p.R228X                 | 0.14                                                                     | 0.13   | 6.00                                                                     | 6.00   |
| 26      | 11.8, 4.6      | F   | <i>mut<sup>p</sup></i> | c.1942G>C p.G642R           | c.1942G>C p.G642R                | 1.60                                                                     | 1.80   | 15.00                                                                    | 15.00  |
| 27      | 11.9, 8.0      | F   | <i>mut<sup>p</sup></i> | c.927G>A p.W309X            | c.983T>C p.L328P                 |                                                                          |        |                                                                          |        |
| 28      | 13.9, 11.9     | M   | <i>mut<sup>p</sup></i> | c.1106G>A p.R369H           | c.1106G>A p.R369H                | 0.24                                                                     | 0.20   | 7.50                                                                     | 7.50   |
| 29      | 13.2, 8        | F   | <i>mut<sup>p</sup></i> | c.2053dupCTC p.685insL      | c.91C>T p.R31X                   | 0.96                                                                     | 1.30   | 12.00                                                                    | 16.00  |
| 30      | 17, 10.5, 12.6 | F   | <i>mut<sup>p</sup></i> | c.1658delT p.V553GfsX17     | c.29dupT p.L111TfsX38            | 0.50                                                                     | 0.50   | 8.50                                                                     | 10.50  |
| 31      | 18.5, 16.4     | M   | <i>mut<sup>p</sup></i> | c.572C>A p.A191E            | c.655A>T p.N219Y                 | 2.10                                                                     | 1.70   |                                                                          |        |
| 32      | 22.5           | M   | <i>mut<sup>p</sup></i> | c.322C>T p.R108C            | c.1106G>A p.R369H                | 0.43                                                                     | 0.43   | 10.0                                                                     | 10.0   |
| 33      | 22.7, 24       | M   | <i>mut<sup>p</sup></i> | c.572C>A p.A191E            | c.682C>T p.R228X                 | 1.50                                                                     | 1.50   | 12.50                                                                    | 16.80  |
| 34      | 24.7           | M   | <i>mut<sup>p</sup></i> | c.655A>T p.N219Y            | c.1048C>T p.H350Y                |                                                                          |        |                                                                          |        |
| 35      | 26.8, 19.9     | F   | <i>mut<sup>p</sup></i> | c.1106G>A p.R369H           | c.1106G>A p.R369H                |                                                                          |        |                                                                          |        |
| 36      | 25.4, 25.4     | F   | <i>mut<sup>p</sup></i> | c.935G>T p.G312V            | c.1909G>A p.G637R                | 1.30                                                                     | 1.20   | 15.00                                                                    | 15.70  |
| 37      | 26.1, 24.2     | M   | <i>mut<sup>p</sup></i> | c.1741C>T p.R581X           | c.1741C>T p.R581X                | 1.40                                                                     | 1.10   | 13.50                                                                    | 14.60  |
| 38      | 26.5, 25.9     | M   | <i>mut<sup>r</sup></i> | c.1760A>C p.Y587S           | c.2150G>T p.G717V                |                                                                          |        |                                                                          |        |
| 39      | 27.5, 20.6     | F   | <i>mut<sup>p</sup></i> | c.2053dupCTC p.685insL      | c.2053dupCTC p.685insL           | 0.80                                                                     | 0.90   |                                                                          |        |
| 40      | 28.5           | F   | <i>mut<sup>r</sup></i> | c.2150G>T p.G717V           | c.2150G>T p.G717V                | 0.70                                                                     | 1.90   | 20.90                                                                    | 20.80  |
| 41      | 28.7           | F   | <i>mut<sup>r</sup></i> | c.2150G>T p.G717V           | unknown                          |                                                                          |        |                                                                          |        |
| 42      | 31.6, 27.5     | F   | <i>mut<sup>p</sup></i> | c.826G>T p.E276x            | c.1106G>A p.R369H                |                                                                          |        |                                                                          |        |
