# Supplementary material
Source: PubMed Central journal article supplement (PMC4841085)
Supplement: Supp_Table2.pdf [file Supp_Table2.pdf]

**Supplementary Table S2.** Chi-square analysis of seroprevalence (titer  $\geq 1:20$ ) of AAV2 and AAV8 neutralizing antibodies in the MMA cohort compared with historical pediatric controls<sup>28</sup>

|          | % Prevalence | NAb+     |          | NAb-     |          | n  | df | $\chi^2$ | p      |
|----------|--------------|----------|----------|----------|----------|----|----|----------|--------|
|          |              | Observed | Expected | Observed | Expected |    |    |          |        |
| AAV2 NAb | 22.1         | 0        | 5.75     | 26       | 20.25    | 26 | 1  | 7.383    | 0.0066 |
| AAV8 NAb | 15.7         | 1        | 5.34     | 33       | 28.66    | 34 | 1  | 4.184    | 0.0408 |

AAV, adeno-associated viral; MMA, methylmalonic acidemia; NAb, neutralizing antibody.
